# Supplementary material for: Cigarette smoke alters the ability of human dendritic cells to promote anti-Streptococcus pneumoniae Th17 response
Source: Springer Nature journal article supplement (doi:10.1186/s12931-016-0408-6), 2016-07-26
Supplement: MOESM2 [file 12931_2016_408_MOESM2_ESM.pdf]

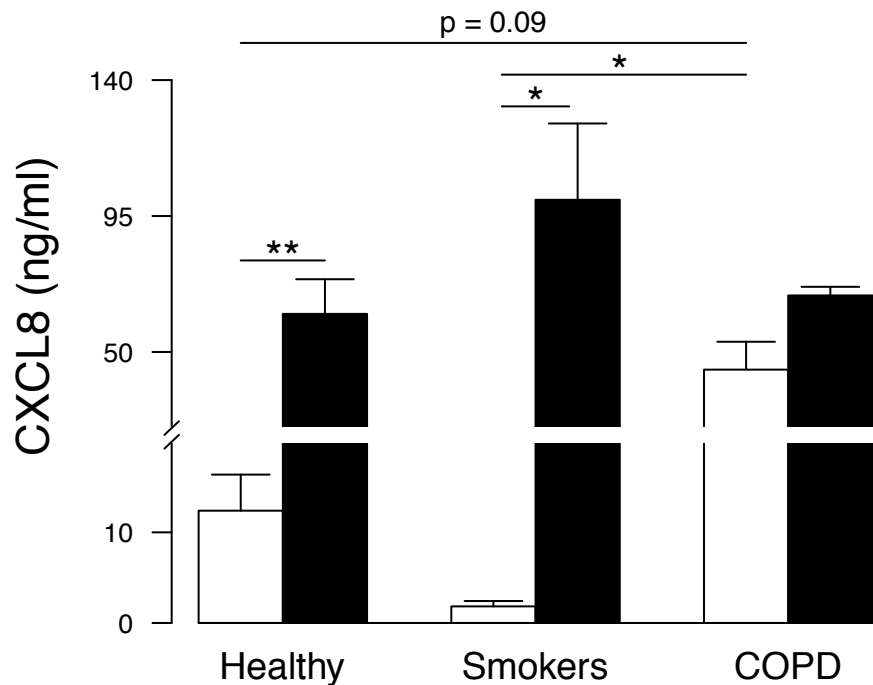

Additional file 2: *S. pneumoniae*-induced CXCL8 secretion by PBMC from non-smoker healthy subjects (n=14), smokers without COPD (n=13) and COPD patients (n=9). Supernatants were collected after 24h incubation without stimulation (white columns) or after addition of *S. pneumoniae* (black column). Data are reported as mean  $\pm$  S.E.M. \*  $P < 0.05$ , \*\*  $P < 0.01$ .
