# Supplementary material for: Cigarette smoke alters the ability of human dendritic cells to promote anti-Streptococcus pneumoniae Th17 response
Source: Springer Nature journal article supplement (doi:10.1186/s12931-016-0408-6), 2016-07-26
Supplement: MOESM6 [file 12931_2016_408_MOESM6_ESM.pdf]

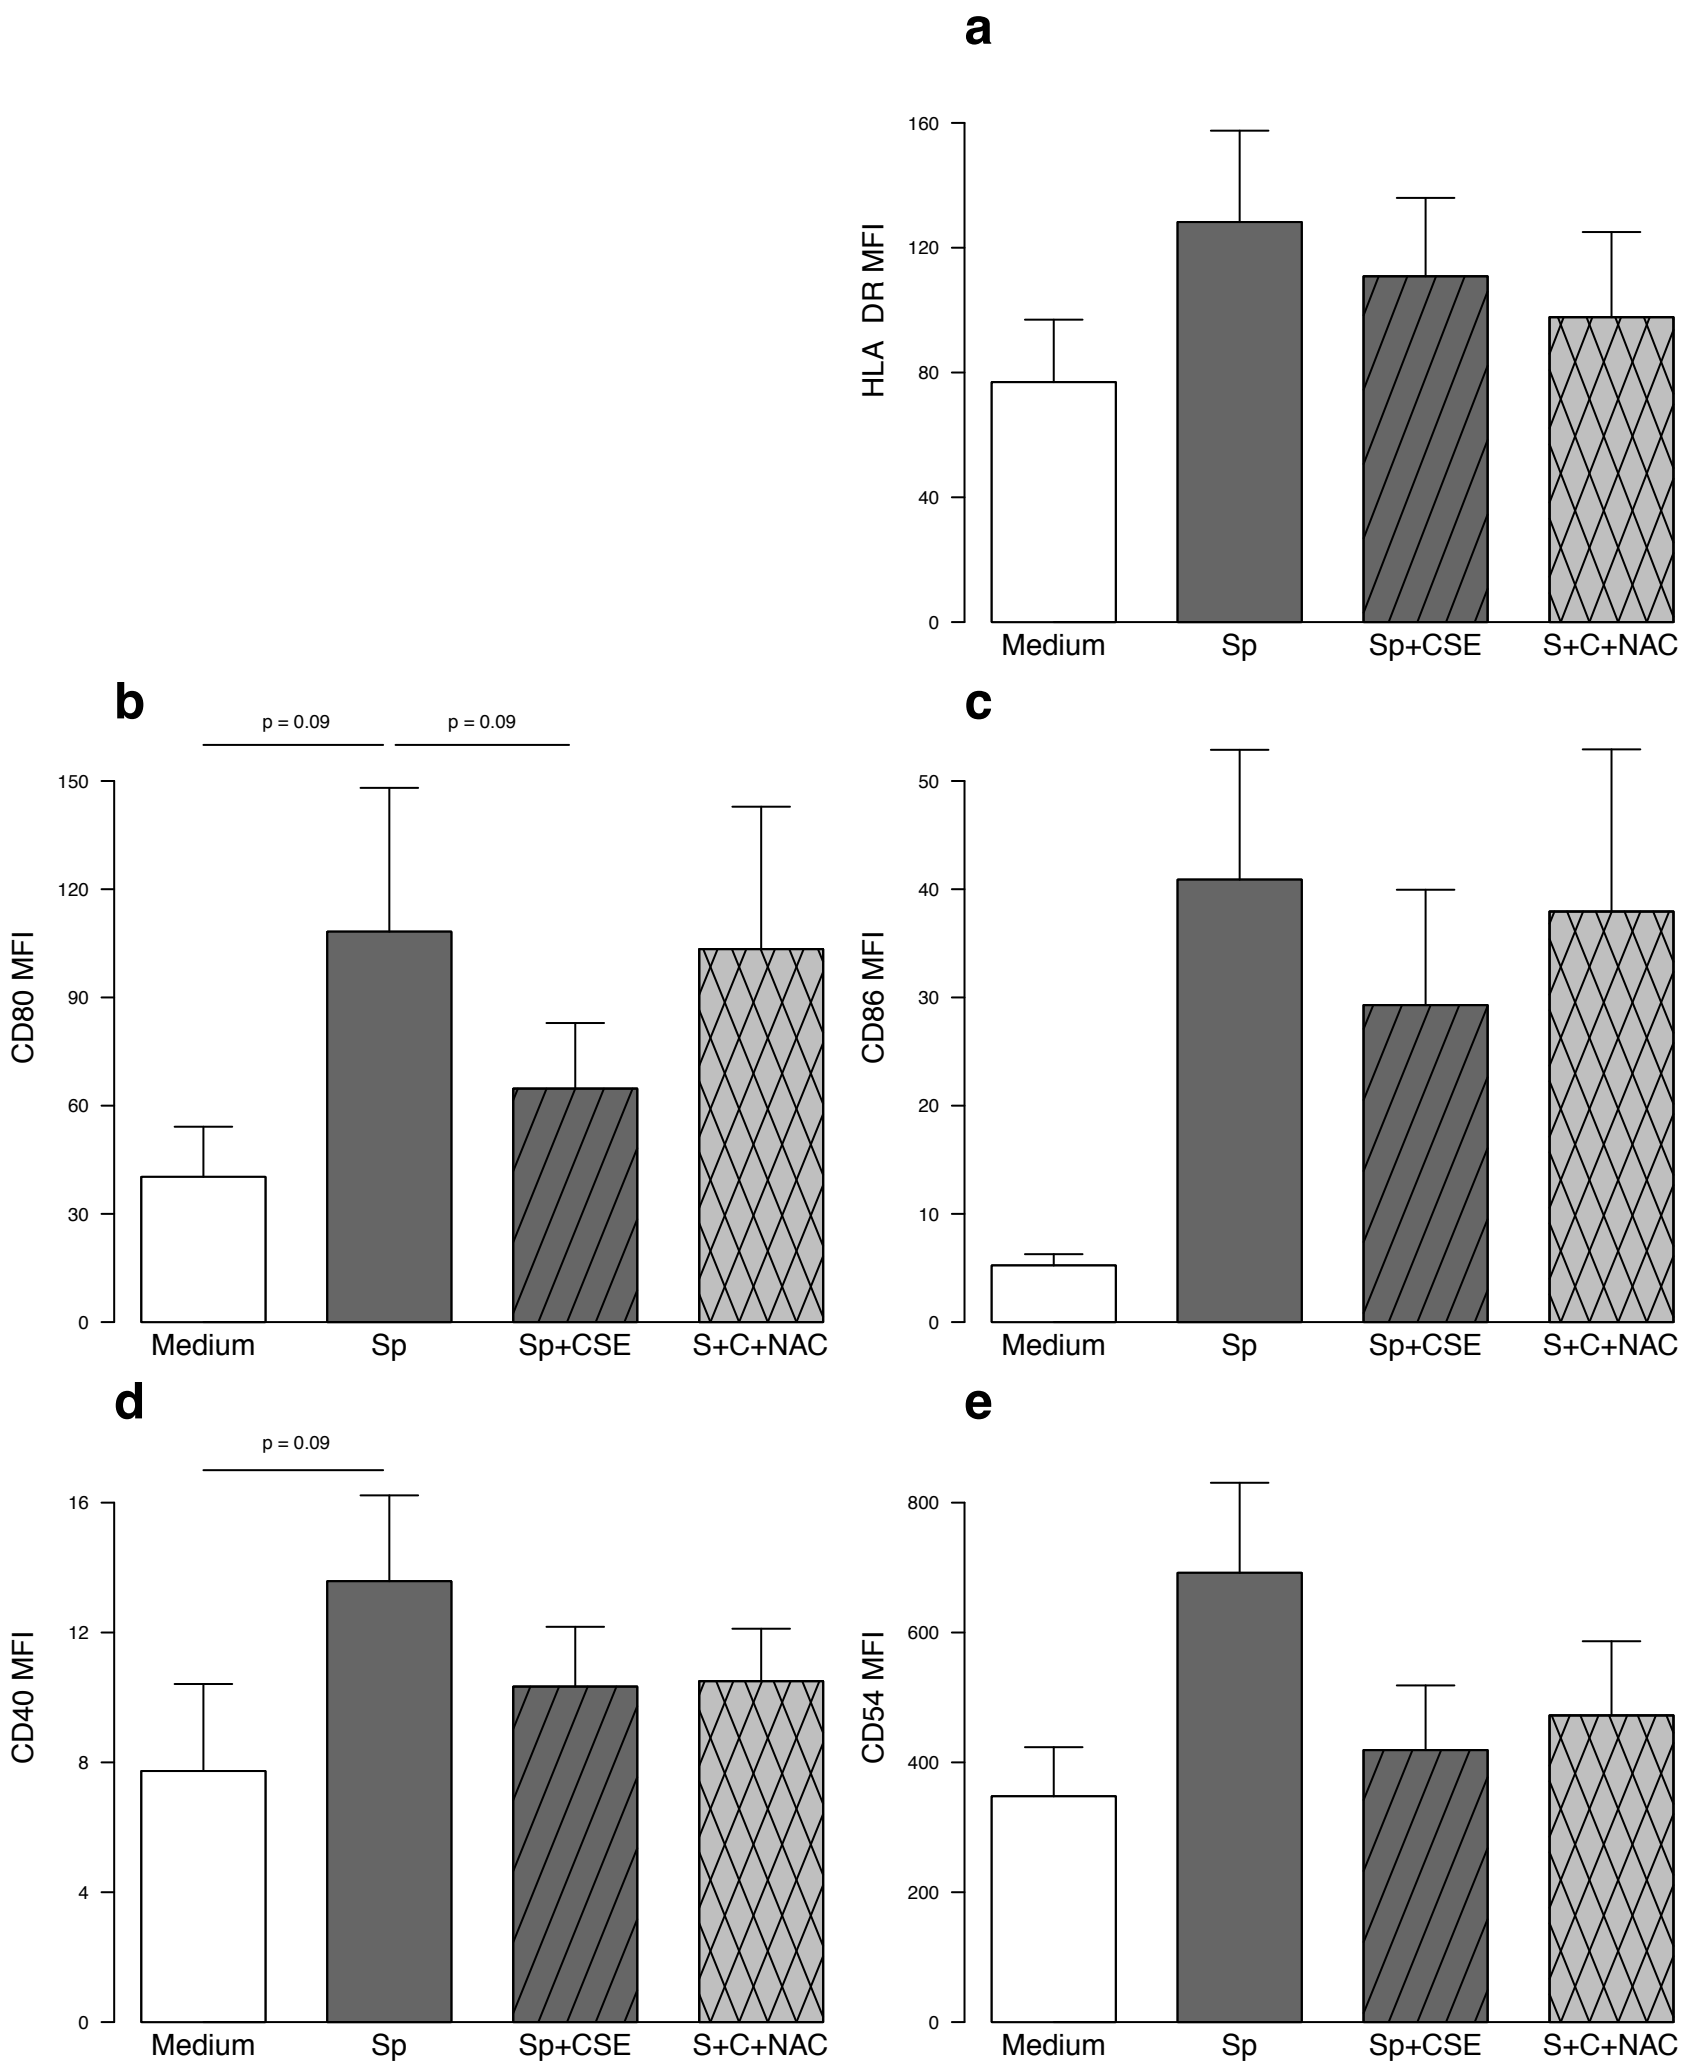

Additional file 6: Treatment with the anti-oxidant N-acetylcystein (NAC) did not reverse the inhibitory effect of cigarette smoke extract (CSE) on the phenotype of monocyte-derived dendritic cells (MDDC) activated by *S. pneumoniae* (Sp). The expression of (a) HLA-DR, (b) CD80, (c) CD86, (d) CD40 and (e) CD54 by MDDC treated or not with NAC and then exposed to CSE and Sp for 24 hours were evaluated by flow cytometry. Data are reported as mean  $\pm$  S.E.M. of 6 experiments
