# Supplementary material for: Cigarette smoke alters the ability of human dendritic cells to promote anti-Streptococcus pneumoniae Th17 response
Source: Springer Nature journal article supplement (doi:10.1186/s12931-016-0408-6), 2016-07-26
Supplement: MOESM7 [file 12931_2016_408_MOESM7_ESM.pdf]

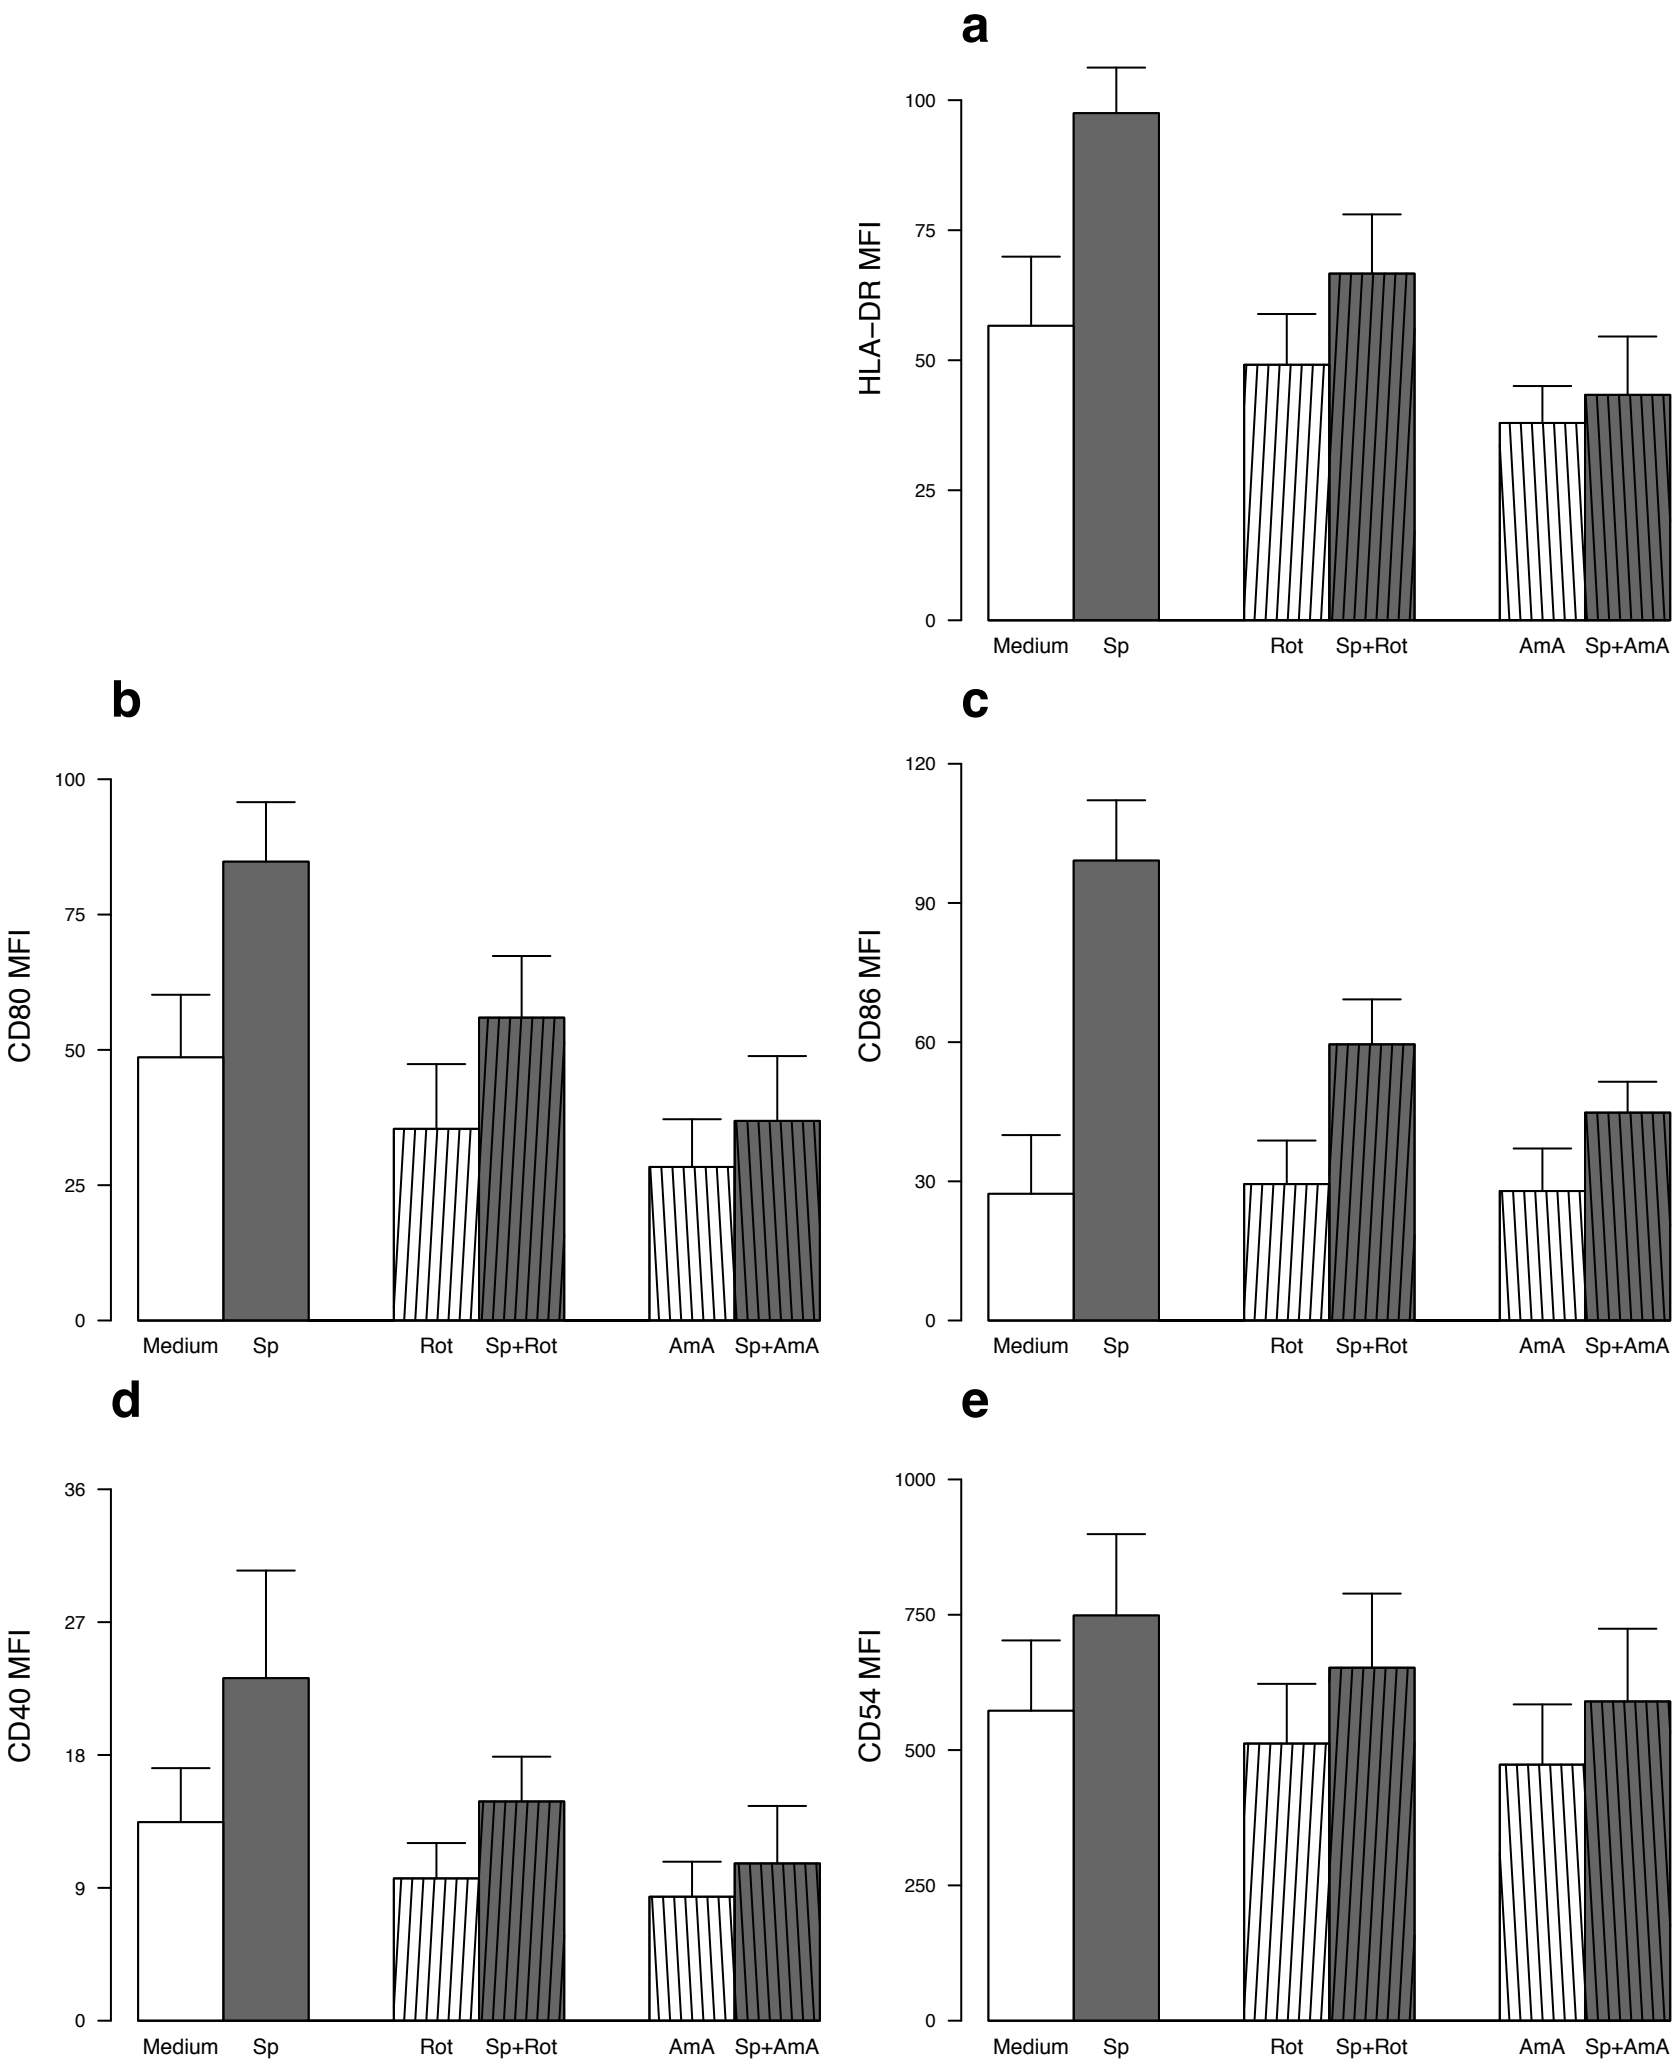

Additional file 7: In vitro exposure to rotenone (Rot) or antimycin A (AmA) inhibits the phenotype of monocyte-derived dendritic cells (MDSC) activated by *S. pneumoniae* (Sp). Expression of (a) HLA-DR, (b) CD80, (c) CD86, (d) CD40 and (e) CD54 were evaluated by flow cytometry in MDSC exposed to rotenone or antimycin A and then activated or not by *S. pneumoniae* for 24 hours. Data represent mean  $\pm$  S.E.M. of 6 experiments. There were no statistical differences between groups.
